# Supplementary material
Source: Springer Nature journal article supplement (https://www.springermedizin.de/resource/supplementary/12879_2012_2020_MOESM5_ESM.pdf/9443508)

### HHV-8 ORF73

Amplification Curves

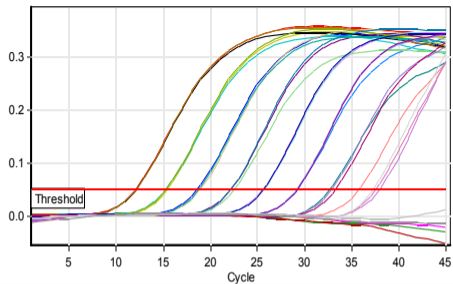

### HHV-8 ORF26

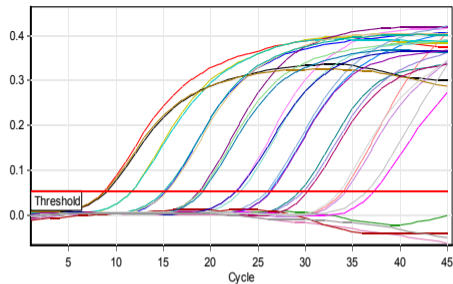

### GAPDH

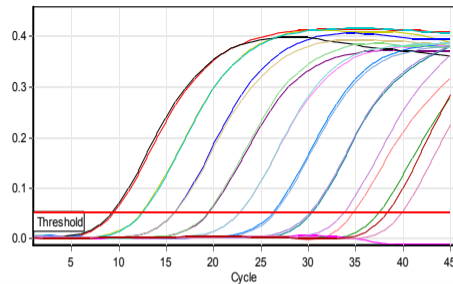

Calibration Curves

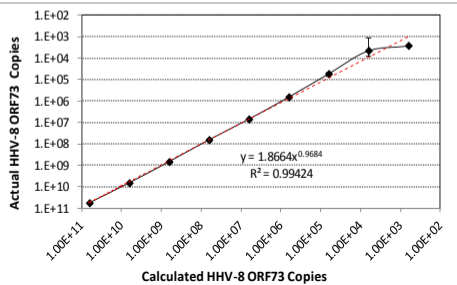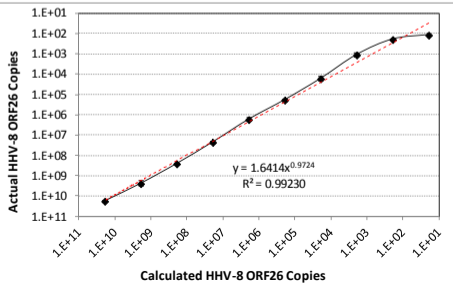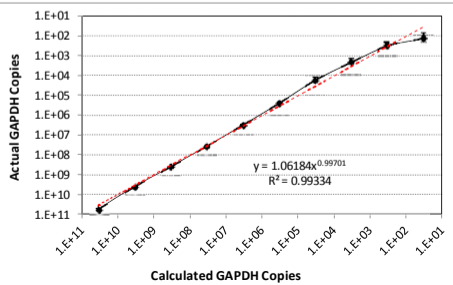

Supplement: MOESM5 [file 9443508]
